# Supplementary material for: FGFR1 Oncogenic Activation Reveals an Alternative Cell of Origin of SCLC in Rb1/p53 Mice
Source: PubMed Central journal article supplement — Cell Rep. 2020 Mar 17;30(11):3837–3850.e3. doi: 10.1016/j.celrep.2020.02.052 (PMC7090386; doi:10.1016/j.celrep.2020.02.052), 2020-03-17
Supplement: mmc1.pdf [file mmc1.pdf]

**Cell Reports, Volume 30**

**Supplemental Information**

**FGFR1 Oncogenic Activation Reveals an Alternative**

**Cell of Origin of SCLC in Rb1/p53 Mice**

**Giustina Ferone, Ji-Ying Song, Oscar Krijgsman, Jan van der Vliet, Miranda Cozijnsen, Ekaterina A. Semenova, David J. Adams, Daniel Peeper, and Anton Berns**

## Supplemental Information

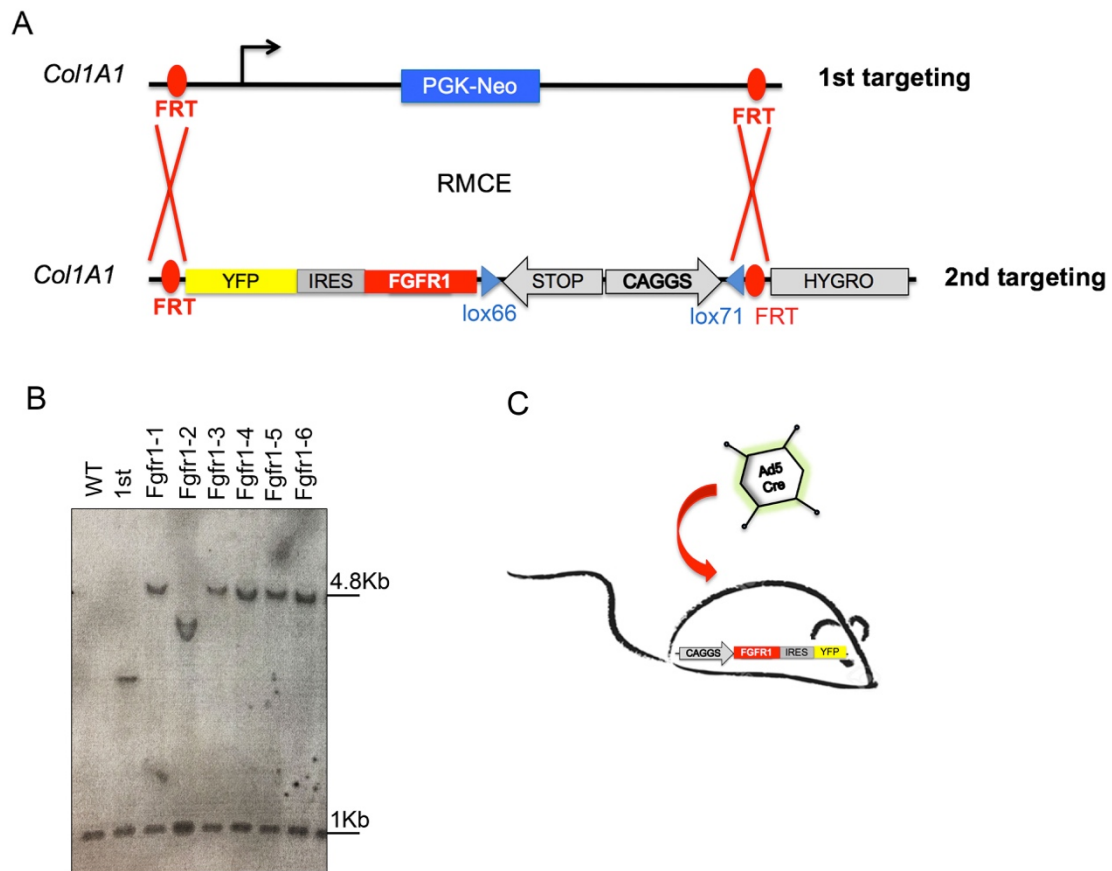

**Figure S1. Related to Figure 1**

(A) Schematic representation of the Flp-recombinase mediated cassette exchange (RMCE) technology: in the first step a cassette containing PGK-Neomycin flanked by FRT sites was targeted by homologous recombination to the *Col1A1* locus; in the second step, positive ES cell clones were transfected with a plasmid containing LSL-FGFR1<sup>K656E</sup> followed by YFP and Flp recombinase, which mediated the cassette exchange.

(B) Southern blotting of BglII digested ES cells genomic DNA, hybridized to the *Col1A1* 3' probe, which anneals to a fragment of 1kb in wild-type mice (I line) and to a fragment of 4.9 kb in mice with a floxed allele. 5/6 Fgfr1 ES clones (Line 3 to 8) were heterozygote for the floxed allele. In line 2, an ES cell clone from the first targeting, was loaded as negative control.

(C) Mice are intratracheally injected with Adenoviruses carrying Cre recombinase in order to activate  $FGFR1^{K656E}$  expression in distinctive cell types.

**Figure S2. Related to Figure 3**

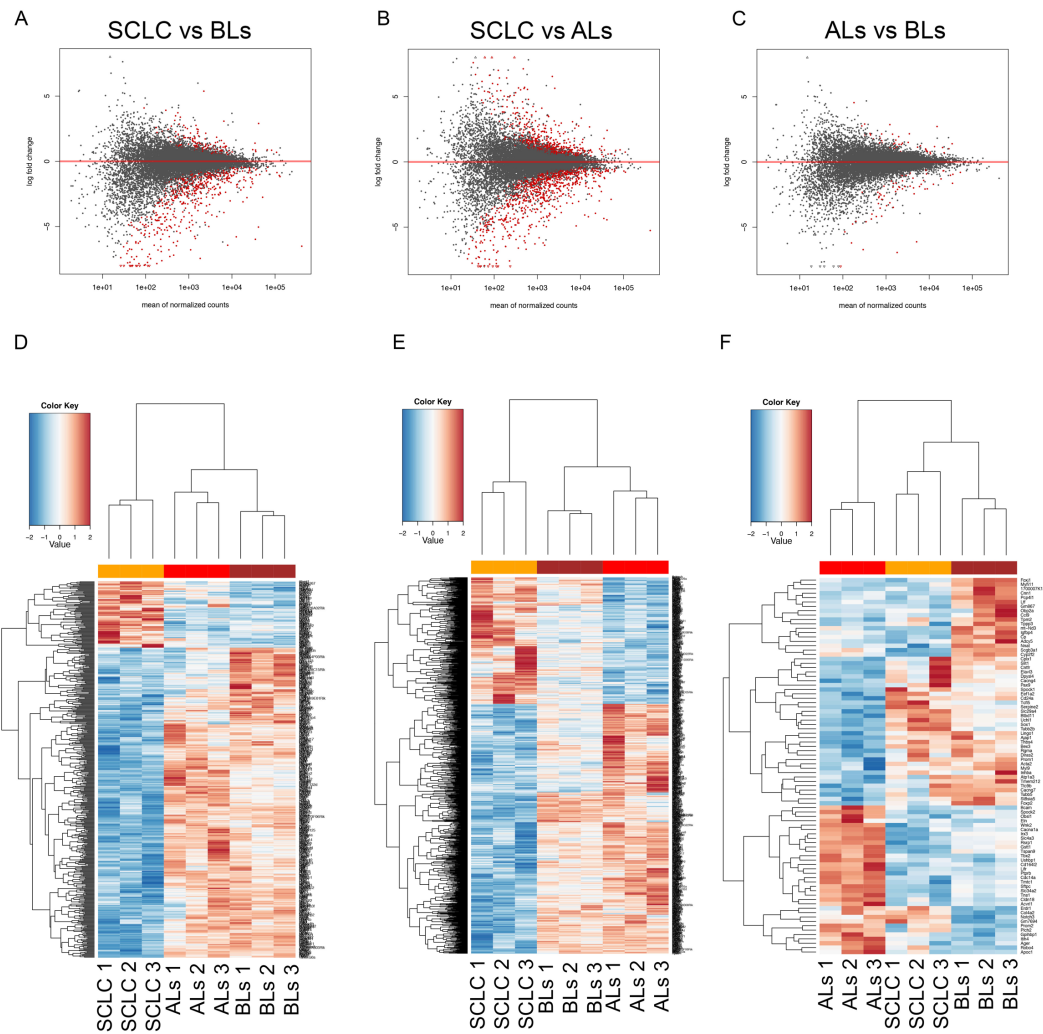

(A-C) MA-plot showing the log<sub>2</sub>-fold change vs abundance of normalized gene expression of SCLC vs BLs (A), SCLC vs ALs (B), ALs vs BLs (C). Each point designates a gene; differentially expressed genes are in red. (D-F) Heatmap of significantly (FDR < 0.05) upregulated and downregulated genes in SCLC vs BLs (D), SCLC vs ALs (E), ALs vs BLs (F).

**Figure S3. Related to Figure 6**

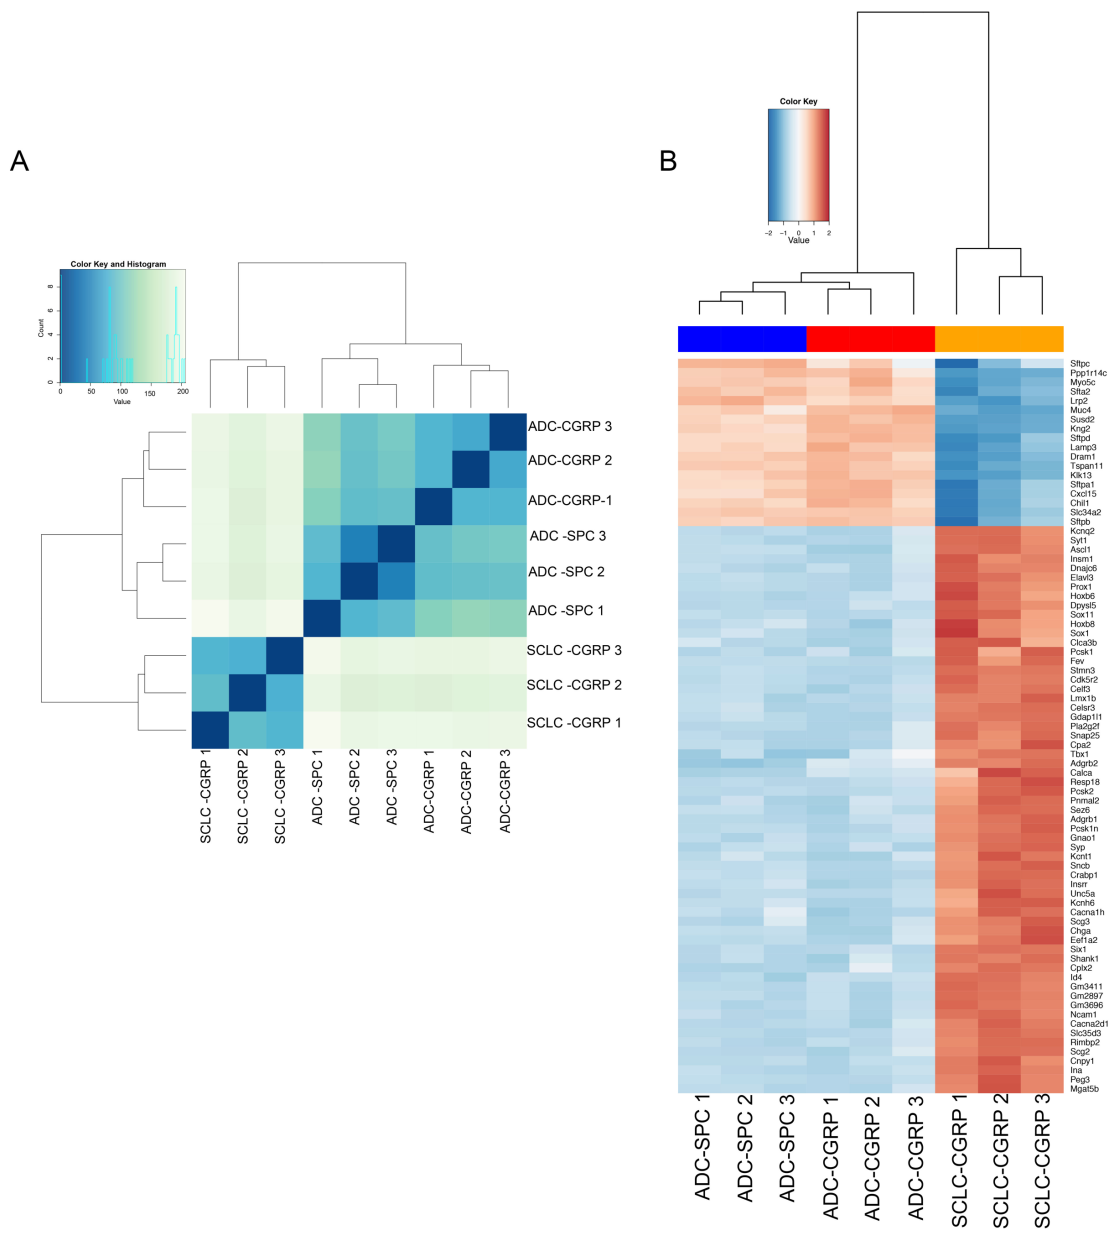

(A) Distance matrix and clustering of samples. Darkest color indicates lowest distance between samples. (B) Heatmap of genes with the highest rotation value for PC1.



**Figure S4. Related to Figure 1**

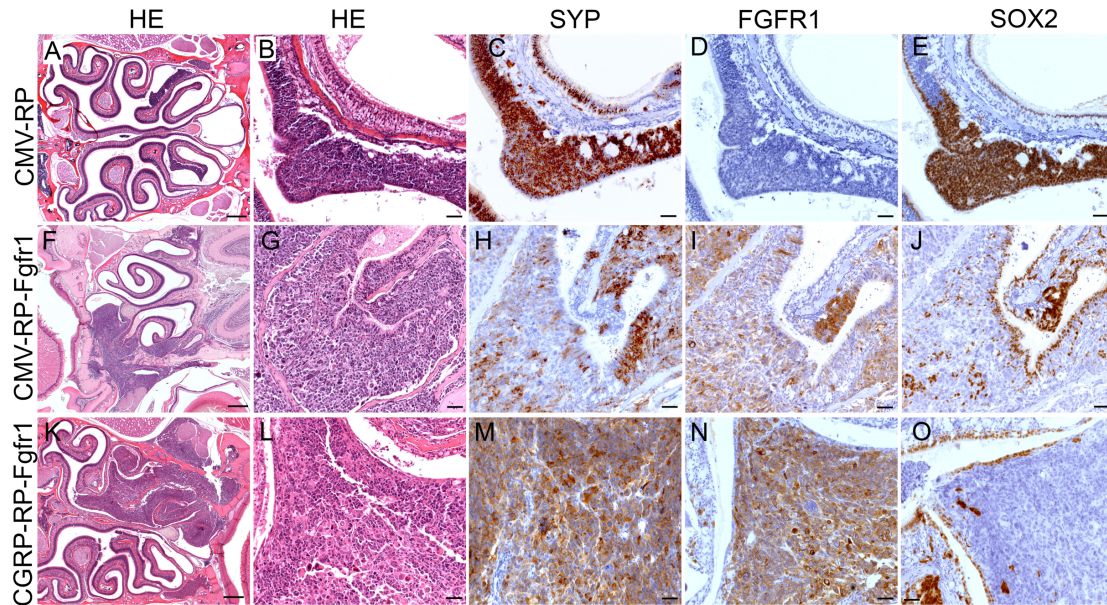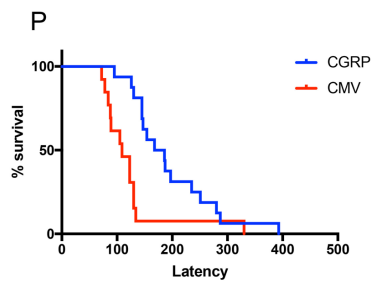

(A-T) HE, SYN, FGFR1, SOX2 staining on nasal sections of RP mice (A-E and K-O) and RP-Fgfr1 mice (F-J and P-T) injected with either Ad5-CMV-Cre (CMV-RP and CMV-RP-Fgfr1, respectively) or Ad5-CGRP-Cre (CGRP-RP and CGRP-RP-Fgfr1, respectively). Scale bar, 50 $\mu$ m.

(U) Nasal tumor-free survival curve of RP-Fgfr1 mice injected with either Ad5-CGRP-Cre (CGRP) or Ad5-CMV-Cre (CMV).

**Table S1. Neoplastic lesions developed by individual RP-Fgfr1 mice injected with Ad5-CMV-Cre. Related to Figure 1.**

| CMV      | PROMAS   | DAYS   | SCLC | *IPD | *BL    | *AL    | *ADC   | *NL       |
|----------|----------|--------|------|------|--------|--------|--------|-----------|
| RP-Fgfr1 | 16GFE125 | **72   | -    | -    | +      | -      | +      | +         |
| RP-Fgfr1 | 16GFE050 | 78     | -    | -    | +      | -      | -      | +         |
| RP-Fgfr1 | 16GFE051 | 84     | -    | -    | -      | -      | -      | +         |
| RP-Fgfr1 | 16GFE067 | 88     | -    | -    | +      | +      | -      | +         |
| RP-Fgfr1 | 16GFE068 | 89     | -    | -    | -      | +      | -      | +         |
| RP-Fgfr1 | 16GFE077 | 105    | -    | -    | +      | -      | -      | +         |
| RP-Fgfr1 | 16GFE148 | 109    | -    | -    | -      | -      | -      | +         |
| RP-Fgfr1 | 15GFE229 | 123    | -    | -    | -      | -      | -      | +         |
| RP-Fgfr1 | 16GFE160 | 123    | -    | -    | +      | +      | +      | +         |
| RP-Fgfr1 | 16GFE096 | 130    | -    | -    | +      | +      | +      | +         |
| RP-Fgfr1 | 16GFE163 | 130    | -    | -    | +      | +      | +      | +         |
| RP-Fgfr1 | 16GFE074 | 134    | -    | -    | -      | -      | -      | +         |
| RP-Fgfr1 | 16GFE080 | 144    | -    | -    | +      | +      | +      | -         |
| RP-Fgfr1 | 15GFE255 | 150    | -    | -    | +      | +      | +      | -         |
| RP-Fgfr1 | 16GFE098 | 162    | -    | -    | +      | -      | +      | -         |
| RP-Fgfr1 | 15GFE286 | 173    | -    | -    | -      | +      | +      | -         |
| RP-Fgfr1 | 16GFE135 | 179    | -    | -    | +      | +      | +      | -         |
| RP-Fgfr1 | 15GFE285 | 187    | -    | -    | +      | +      | +      | -         |
| RP-Fgfr1 | 15GFE291 | 189    | +    | -    | +      | -      | +      | -         |
| RP-Fgfr1 | 16GFE150 | 231    | -    | -    | +      | +      | +      | +         |
| RP-Fgfr1 | 16GFE042 | 330    | +    | -    | +      | +      | -      | +         |
| RP-Fgfr1 | 16GFE062 | 393    | -    | -    | -      | -      | -      | -         |
|          |          | 105,41 | 0%   | 0%   | 58,33% | 41,67% | 33,33% | ***63,63% |
|          |          | 213,8  | 20%  | 0%   | 80%    | 70%    | 80%    |           |

\*IPD: intrapulmonary dissemination; BL: bronchial lesions; AL: alveolar lesions; ADC: Adenocarcinoma.; NL: nasal lesions.

\*\*Samples depicted in beige indicate mice that died prematurely due to other phenotypes (e.g. nasal tumor) and therefore did not live long enough to develop lung tumors with an expected longer latency such as SCLC. For this reason, we calculated two different penetrance, depicted as well in beige or in white, according to the considered mouse group.

\*\*\*Nasal tumor are independent from lung tumors and have a much shorter latency, therefore their penetrance is calculated on the total mouse number.

**Table S2. Neoplastic lesions developed by individual RP mice injected with Ad5-CMV-Cre. Related to Figure 1**

| CMV | PROMAS   | DAYS   | SCLC | *IPD | *BL    | *AL | *ADC | *NL    |
|-----|----------|--------|------|------|--------|-----|------|--------|
| RP  | 16GFE092 | **123  | -    | -    | +      | -   | -    | +      |
| RP  | 16GFE109 | 169    | -    | -    | +      | +   | -    | NA     |
| RP  | 16GFE110 | 169    | -    | -    | +      | -   | -    | NA     |
| RP  | 17GFE042 | 191    | +    | +    | -      | +   | -    | +      |
| RP  | 16GFE128 | 199    | +    | +    | +      | +   | -    | -      |
| RP  | 16GFE152 | 208    | +    | +    | +      | -   | -    | -      |
| RP  | 16GFE154 | 208    | +    | +    | -      | -   | -    | -      |
| RP  | 17GFE079 | 219    | +    | +    | +      | +   | -    | -      |
| RP  | 16GFE127 | 223    | +    | +    | -      | -   | -    | -      |
| RP  | 16GFE023 | 231    | +    | +    | -      | +   | -    | -      |
| RP  | 16GFE026 | 235    | +    | +    | -      | -   | -    | NA     |
| RP  | 16GFE141 | 244    | +    | +    | +      | +   | -    | -      |
| RP  | 16GFE142 | 244    | +    | +    | +      | +   | -    | -      |
| RP  | 16GFE144 | 245    | +    | +    | +      | -   | -    | -      |
| RP  | 17GFE103 | 247    | +    | +    | +      | -   | -    | -      |
| RP  | 16GFE162 | 249    | +    | +    | -      | +   | -    | -      |
| RP  | 16GFE032 | 260    | +    | +    | -      | +   | -    | -      |
| RP  | 16GFE034 | 260    | +    | +    | -      | +   | -    | -      |
| RP  | 17GFE001 | 266    | +    | +    | +      | -   | -    | +      |
| RP  | 16GFE035 | 267    | +    | +    | -      | +   | -    | -      |
| RP  | 16GFE166 | 277    | +    | +    | -      | -   | -    | -      |
| RP  | 17GFE009 | 298    | +    | +    | +      | -   | -    | -      |
| RP  | 17GFE041 | 333    | +    | +    | +      | -   | -    | -      |
|     |          |        | NA   | NA   | NA     | NA  | NA   | ***15% |
|     |          | 238,27 | 90%  | 90%  | 54,54% | 50% | 0%   |        |

\*IPD: intrapulmonary dissemination; BL: bronchial lesions; AL: alveolar lesions; ADC: Adenocarcinoma.; NL: nasal lesions.

\*\*Samples depicted in beige indicate mice that died prematurely due to other phenotypes (e.g. nasal tumor) and therefore did not live long enough to develop lung tumors with an expected longer latency such as SCLC. For this reason, we calculated two different penetrance, depicted as well in beige or in white, according to the considered mouse group.

\*\*\*Nasal tumor are independent from lung tumors and have a much shorter latency, therefore their penetrance is calculated on the total mouse number.

**Table S3. Neoplastic lesions developed by individual RP-Fgfr1 mice injected with Ad5-CGRP-Cre. Related to Figure 1.**

| <b>CGRP</b> | <b>PROMAS</b> | <b>DAYS</b> | <b>SCLC</b> | <b>*IPD</b> | <b>*BL</b> | <b>*AL</b> | <b>*ADC</b> | <b>*NL</b> |
|-------------|---------------|-------------|-------------|-------------|------------|------------|-------------|------------|
| RP-Fgfr1    | 16GFE069      | **95        | -           | -           | -          | -          | -           | +          |
| RP-Fgfr1    | 16GFE149      | 112         | -           | -           | -          | -          | -           | -          |
| RP-Fgfr1    | 16GFE070      | 126         | -           | -           | -          | -          | -           | +          |
| RP-Fgfr1    | 16GFE095      | 130         | -           | -           | -          | -          | -           | +          |
| RP-Fgfr1    | 16GFE168      | 142         | -           | -           | -          | -          | -           | -          |
| RP-Fgfr1    | 16GFE170      | 142         | -           | -           | -          | -          | -           | +          |
| RP-Fgfr1    | 16GFE169      | 142         | -           | -           | -          | -          | -           | +          |
| RP-Fgfr1    | 16GFE171      | 142         | -           | -           | +          | -          | -           | -          |
| RP-Fgfr1    | 15GFE252      | 145         | -           | -           | -          | -          | -           | +          |
| RP-Fgfr1    | 15GFE253      | 145         | -           | -           | -          | -          | -           | +          |
| RP-Fgfr1    | 16GFE081      | 147         | -           | -           | -          | -          | -           | +          |
| RP-Fgfr1    | 16GFE112      | 154         | -           | -           | -          | -          | -           | +          |
| RP-Fgfr1    | 16GFE103      | 168         | -           | -           | -          | -          | -           | +          |
| RP-Fgfr1    | 17GFE046      | 186         | -           | -           | -          | -          | -           | +          |
| RP-Fgfr1    | 15GFE284      | 187         | -           | -           | -          | -          | -           | +          |
| RP-Fgfr1    | 16GFE145      | 193         | -           | -           | -          | -          | -           | +          |
| RP-Fgfr1    | 16GFE147      | 197         | -           | -           | +          | +          | +           | +          |
| RP-Fgfr1    | 16GFE007      | 207         | -           | -           | +          | -          | -           | +          |
| RP-Fgfr1    | 17GFE094      | 235         | -           | -           | +          | -          | +           | +          |
| RP-Fgfr1    | 17GFE099      | 238         | -           | -           | -          | +          | -           | -          |
| RP-Fgfr1    | 17GFE006      | 251         | -           | -           | -          | +          | -           | +          |
| RP-Fgfr1    | 17GFE013      | 280         | -           | -           | -          | -          | -           | +          |
| RP-Fgfr1    | 16GFE033      | 287         | -           | -           | -          | -          | +           | -          |
| RP-Fgfr1    | 16GFE040      | 280         | -           | -           | -          | -          | -           | +          |
| RP-Fgfr1    | 17GFE155      | 304         | -           | -           | -          | -          | +           | -          |
| RP-Fgfr1    | 16GFE047      | 356         | +           | +           | +          | +          | +           | -          |
| RP-Fgfr1    | 17GFE198      | 375         | +           | +           | -          | +          | +           | -          |
| RP-Fgfr1    | 16GFE057      | 393         | +           | +           | +          | +          | -           | +          |
| RP-Fgfr1    | 16ESE019      | 416         | -           | -           | -          | -          | +           | NA         |
|             |               | 135,17      | 0%          | 0%          | 8%         | 0%         | 0%          | ***71,42%  |
|             |               | 267,82      | 17,64%      | 17,64%      | 29,41%     | 35,29%     | 41,17%      |            |

\*IPD: intrapulmonary dissemination; BL: bronchial lesions; AL: alveolar lesions; ADC: Adenocarcinoma.; NL: nasal lesions.

\*\*Samples depicted in beige indicate mice that died prematurely due to other phenotypes (e.g. nasal tumor) and therefore did not live long enough to develop lung tumors with an expected longer latency such as SCLC. For this reason, we calculated two different penetrance, depicted as well in beige or in white, according to the considered mouse group.

\*\*\*Nasal tumor are independent from lung tumors and have a much shorter latency, therefore their penetrance is calculated on the total mouse number.

**Table S4. Neoplastic lesions developed by individual RP mice injected with Ad5-CGRP-Cre. Related to Figure 1.**

| CGRP | PROMAS   | DAYS   | SCLC   | *IPD   | *BL   | *AL    | *ADC  | *NL   |
|------|----------|--------|--------|--------|-------|--------|-------|-------|
| RP   | 16GFE102 | 168    | -      | -      | -     | -      | -     | NA    |
| RP   | 16GFE104 | 168    | -      | -      | -     | -      | -     | NA    |
| RP   | 16GFE105 | 168    | -      | -      | -     | -      | -     | NA    |
| RP   | 16GFE116 | 201    | -      | -      | -     | -      | -     | NA    |
| RP   | 17GFE098 | 235    | +      | -      | -     | +      | -     | -     |
| RP   | 16GFE143 | 245    | -      | -      | -     | -      | -     | -     |
| RP   | 16GFE164 | 249    | -      | -      | -     | -      | +     | -     |
| RP   | 17GFE113 | 249    | -      | -      | -     | -      | -     | -     |
| RP   | 17GFE118 | 259    | -      | -      | -     | -      | -     | -     |
| RP   | 17GFE131 | 268    | +      | -      | +     | +      | -     | -     |
| RP   | 17GFE036 | 271    | +      | +      | -     | -      | -     | NA    |
| RP   | 17GFE135 | 273    | +      | -      | -     | -      | -     | -     |
| RP   | 17GFE142 | 284    | +      | +      | -     | -      | -     | -     |
| RP   | 15ESE030 | 288    | +      | +      | -     | -      | -     | NA    |
| RP   | 17GFE005 | 293    | -      | +      | -     | +      | -     | -     |
| RP   | 17GFE154 | 295    | +      | +      | -     | -      | -     | -     |
| RP   | 15ESE034 | 307    | +      | +      | -     | -      | -     | NA    |
| RP   | 15ESE036 | 311    | +      | +      | -     | +      | -     | NA    |
| RP   | 16GFE043 | 343    | +      | -      | -     | -      | -     | NA    |
| RP   | 17GFE080 | 369    | +      | +      | -     | +      | -     | -     |
| RP   | 17GFE137 | 369    | +      | -      | -     | +      | -     | -     |
| RP   | 16GFE052 | 383    | +      | +      | -     | -      | -     | -     |
| RP   | 16GFE056 | 393    | -      | -      | -     | -      | -     | -     |
| RP   | 17GFE217 | 399    | +      | +      | -     | -      | -     | -     |
| RP   | 17GFE124 | 413    | +      | -      | +     | -      | -     | -     |
| RP   | 17GFE125 | 413    | -      | -      | -     | +      | -     | -     |
| RP   | 17GFE126 | 413    | -      | -      | -     | -      | -     | -     |
| RP   | 17GFE252 | 567    | -      | -      | -     | -      | -     | -     |
| RP   | 17GFE255 | 598    | -      | -      | -     | +      | -     | -     |
|      |          | 316,96 | 51,72% | 34,44% | 6,89% | 27,58% | 3,44% | ***0% |

\*IPD: intrapulmonary dissemination; BL: bronchial lesions; AL: alveolar lesions; ADC: Adenocarcinoma.; NL: nasal lesions.

\*\*Samples depicted in beige indicate mice that died prematurely due to other phenotypes (e.g. nasal tumor) and therefore did not live long enough to develop lung tumors with an expected longer latency such as SCLC. For this reason, we calculated two different penetrance, depicted as well in beige or in white, according to the considered mouse group.

\*\*\*Nasal tumor are independent from lung tumors and have a much shorter latency, therefore their penetrance is calculated on the total mouse number.

**Table S5. Neoplastic lesions developed by individual RP-Fgfr1 mice injected with Ad5-K14-Cre. Related to Figure 4.**

| K14      | PROMAS   | DAYS   | SCLC | *IPD | *BL    | *AL    | *ADC   | *NL       |
|----------|----------|--------|------|------|--------|--------|--------|-----------|
| RP-Fgfr1 | 17GFE166 | **88   | -    | -    | -      | -      | -      | +         |
| RP-Fgfr1 | 17GFE171 | 102    | -    | -    | -      | -      | -      | +         |
| RP-Fgfr1 | 17GFE188 | 130    | -    | -    | -      | -      | -      | +         |
| RP-Fgfr1 | 17GFE191 | 138    | -    | -    | -      | -      | -      | +         |
| RP-Fgfr1 | 17GFE202 | 160    | -    | -    | -      | -      | -      | +         |
| RP-Fgfr1 | 17GFE216 | 172    | +    | +    | -      | +      | -      | -         |
| RP-Fgfr1 | 17GFE224 | 197    | -    | -    | -      | -      | -      | +         |
| RP-Fgfr1 | 17GFE225 | 207    | -    | -    | +      | -      | +      | -         |
| RP-Fgfr1 | 17GFE283 | 252    | +    | +    | -      | -      | -      | -         |
| RP-Fgfr1 | 18GFE003 | 281    | -    | -    | -      | -      | -      | -         |
| RP-Fgfr1 | 18GFE008 | 291    | -    | -    | -      | +      | -      | +         |
| RP-Fgfr1 | 18GFE049 | 340    | +    | +    | +      | +      | +      | +         |
| RP-Fgfr1 | 18GFE055 | 351    | +    | +    | -      | +      | +      | +         |
| RP-Fgfr1 | 18GFE060 | 357    | +    | +    | +      | +      | -      | -         |
| RP-Fgfr1 | 18GFE070 | 370    | +    | +    | -      | +      | +      | NA        |
| RP-Fgfr1 | 18GFE127 | 466    | -    | -    | -      | +      | -      | NA        |
| RP-Fgfr1 | 18GFE051 | 344    | -    | -    | +      | -      | +      | +         |
|          |          | 123,6  | 0%   | 0%   | 0%     | 0%     | 0%     | ***66,66% |
|          |          | 302,33 | 50%  | 50%  | 33,33% | 58,33% | 41,66% |           |

\*IPD: intrapulmonary dissemination; BL: bronchial lesions; AL: alveolar lesions; ADC: Adenocarcinoma.; NL: nasal lesions.

\*\*Samples depicted in beige indicate mice that died prematurely due to other phenotypes (e.g. nasal tumor) and therefore did not live long enough to develop lung tumors with an expected longer latency such as SCLC. For this reason, we calculated two different penetrance, depicted as well in beige or in white, according to the considered mouse group.

\*\*\*Nasal tumor are independent from lung tumors and have a much shorter latency, therefore their penetrance is calculated on the total mouse number.

**Table S6. Neoplastic lesions developed by individual RP mice injected with Ad5-K14-Cre. Related to Figure 4.**

| K14 | PROMAS   | DAYS   | SCLC | *IPD | *BL   | *AL | *ADC | *NL       |
|-----|----------|--------|------|------|-------|-----|------|-----------|
| RP  | 17GFE197 | **111  | -    | -    | -     | -   | -    | +         |
| RP  | 17GFE289 | 253    | -    | -    | -     | -   | -    | -         |
| RP  | 17GFE328 | 267    | +    | +    | -     | -   | -    | -         |
| RP  | 18GFE004 | 246    | -    | -    | -     | -   | -    | -         |
| RP  | 18GFE006 | 251    | +    | +    | -     | -   | -    | -         |
| RP  | 18GFE045 | 321    | +    | +    | -     | -   | -    | +         |
| RP  | 18GFE056 | 320    | +    | +    | -     | +   | -    | -         |
| RP  | 18GFE066 | 334    | +    | +    | +     | -   | -    | NA        |
| RP  | 18GFE073 | 340    | +    | +    | -     | +   | -    | NA        |
| RP  | 18GFE103 | 414    | +    | +    | -     | -   | -    | NA        |
| RP  | 18GFE108 | 435    | +    | +    | -     | -   | -    | NA        |
| RP  | 18GFE122 | 459    | +    | +    | -     | -   | -    | NA        |
| RP  | 18GFE123 | 466    | -    | -    | -     | +   | -    | NA        |
| RP  | 18GFE124 | 466    | -    | -    | -     | -   | -    | NA        |
| RP  | 18GFE125 | 431    | -    | -    | -     | -   | -    | NA        |
| RP  | 18GFE126 | 431    | -    | -    | -     | -   | -    | NA        |
|     |          |        | 0%   | 0%   | 0%    | 0%  | 0%   | ***28,50% |
|     |          | 362,27 | 60%  | 60%  | 6,67% | 20% | 0%   |           |

\*IPD: intrapulmonary dissemination; BL: bronchial lesions; AL: alveolar lesions; ADC: Adenocarcinoma.; NL: nasal lesions.

\*\*Samples depicted in beige indicate mice that died prematurely due to other phenotypes (e.g. nasal tumor) and therefore did not live long enough to develop lung tumors with an expected longer latency such as SCLC. For this reason, we calculated two different penetrance, depicted as well in beige or in white, according to the considered mouse group.

\*\*\*Nasal tumor are independent from lung tumors and have a much shorter latency, therefore their penetrance is calculated on the total mouse number.

**Table S7. Neoplastic lesions developed by individual RP-Fgfr1 mice injected with Ad5-SPC-Cre. Related to Figure 5.**

| SPC      | PROMAS   | DAYS   | SCLC | *IPD | *BL   | *AL | *ADC | *NL   |
|----------|----------|--------|------|------|-------|-----|------|-------|
| RP-Fgfr1 | 16GFE093 | 125    | -    | -    | -     | -   | +    | +     |
| RP-Fgfr1 | 17GFE003 | 142    | -    | -    | -     | -   | +    | -     |
| RP-Fgfr1 | 16GFE114 | 144    | -    | -    | -     | -   | +    | -     |
| RP-Fgfr1 | 16GFE082 | 147    | -    | -    | -     | -   | +    | -     |
| RP-Fgfr1 | 16GFE084 | 150    | -    | -    | -     | -   | +    | -     |
| RP-Fgfr1 | 16GFE085 | 151    | -    | -    | -     | -   | +    | -     |
| RP-Fgfr1 | 16GFE090 | 151    | -    | -    | -     | -   | +    | -     |
| RP-Fgfr1 | 16GFE091 | 151    | -    | -    | +     | -   | +    | -     |
| RP-Fgfr1 | 16GFE119 | 153    | -    | -    | -     | -   | +    | NA    |
| RP-Fgfr1 | 16GFE120 | 153    | -    | -    | -     | -   | +    | NA    |
| RP-Fgfr1 | 16GFE099 | 162    | -    | -    | -     | -   | +    | NA    |
| RP-Fgfr1 | 17GFE026 | 168    | -    | -    | -     | -   | +    | -     |
| RP-Fgfr1 | 16GFE121 | 173    | -    | -    | -     | -   | +    | NA    |
| RP-Fgfr1 | 16GFE118 | 182    | -    | -    | -     | -   | +    | NA    |
| RP-Fgfr1 | 16GFE129 | 200    | -    | -    | -     | -   | +    | -     |
| RP-Fgfr1 | 17GFE057 | 203    | -    | -    | -     | -   | +    | -     |
| RP-Fgfr1 | 16GFE153 | 239    | -    | -    | -     | -   | +    | -     |
|          |          | 164,35 | 0%   | 0%   | 5,88% | 0%  | 100% | 8,33% |

\*Besides SCLC, NE neoplastic lesions include IPD: intrapulmonary dissemination, BL: bronchial lesions; AL: alveolar lesions. ADC: Adenocarcinoma. NL: nasal lesions.

**Table S8. Neoplastic lesions developed by individual RP mice injected with Ad5-SPC-Cre. Related to Figure 5.**

| SPC | PROMAS   | DAYS  | SCLC | *IPD | *BL | *AL | *ADC | *NL    |
|-----|----------|-------|------|------|-----|-----|------|--------|
| RP  | 16GFE107 | 169   | -    | -    | -   | -   | -    | NA     |
| RP  | 16GFE108 | 169   | -    | -    | -   | -   | -    | NA     |
| RP  | 16GFE111 | 169   | -    | -    | -   | -   | -    | NA     |
| RP  | 17GFE070 | 301   | +    | +    | -   | -   | -    | -      |
| RP  | 17GFE153 | 417   | -    | -    | -   | -   | -    | -      |
| RP  | 17GFE181 | 333   | +    | +    | -   | -   | -    | +      |
| RP  | 17GFE187 | 357   | +    | +    | -   | -   | -    | -      |
| RP  | 17GFE221 | 505   | +    | +    | -   | -   | -    | -      |
| RP  | 17GFE226 | 434   | +    | +    | -   | -   | -    | -      |
| RP  | 17GFE260 | 472   | -    | -    | -   | +   | -    | -      |
|     |          | 332,6 | 50%  | 50%  | 0%  | 10% | 0%   | 14,29% |

\*Besides SCLC, NE neoplastic lesions include IPD: intrapulmonary dissemination, BL: bronchial lesions; AL: alveolar lesions. ADC: Adenocarcinoma. NL: nasal lesions.



**Table S9. Neoplastic lesions developed by individual RP-Fgfr1 mice injected with Ad5-CC10-Cre. Related to Figure 5.**

| CC10     | PROMAS   | DAYS   | SCLC | *IPD | *BL | *AL | *ADC   | *NL    |
|----------|----------|--------|------|------|-----|-----|--------|--------|
| RP-Fgfr1 | 17GFE030 | 253    | -    | -    | -   | -   | +      | NA     |
| RP-Fgfr1 | 17GFE031 | 253    | -    | -    | -   | -   | +      | NA     |
| RP-Fgfr1 | 17GFE032 | 253    | -    | -    | -   | -   | -      | NA     |
| RP-Fgfr1 | 17GFE043 | 268    | -    | -    | -   | -   | +      | -      |
| RP-Fgfr1 | 17GFE059 | 279    | -    | -    | -   | -   | +      | -      |
| RP-Fgfr1 | 17GFE072 | 290    | -    | -    | -   | -   | +      | -      |
| RP-Fgfr1 | 17GFE088 | 310    | -    | -    | -   | -   | +      | -      |
| RP-Fgfr1 | 17GFE115 | 330    | -    | -    | -   | -   | +      | -      |
| RP-Fgfr1 | 17GFE167 | 399    | -    | -    | -   | -   | +      | +      |
|          |          | 292,78 | 0%   | 0%   | 0%  | 0%  | 88,89% | 16,67% |

\*Besides SCLC, NE neoplastic lesions include IPD: intrapulmonary dissemination, BL: bronchial lesions; AL: alveolar lesions. ADC: Adenocarcinoma. NL: nasal lesions.

**Table S10. Neoplastic lesions developed by individual RP mice injected with Ad5-CC10-Cre. Related to Figure 5.**

| CC10 | PROMAS   | DAYS   | SCLC | *IPD | *BL | *AL | *ADC | *NL |
|------|----------|--------|------|------|-----|-----|------|-----|
| RP   | 16GFE146 | 184    | -    | -    | -   | -   | -    | -   |
| RP   | 17GFE033 | 253    | -    | -    | -   | -   | -    | NA  |
| RP   | 17GFE034 | 253    | -    | -    | -   | -   | -    | NA  |
| RP   | 17GFE035 | 253    | -    | -    | -   | -   | -    | NA  |
| RP   | 17GFE150 | 370    | +    | +    | -   | -   | -    | -   |
| RP   | 17GFE156 | 380    | -    | -    | -   | -   | -    | -   |
| RP   | 17GFE247 | 549    | +    | -    | -   | +   | -    | -   |
| RP   | 17GFE253 | 555    | -    | -    | +   | -   | -    | -   |
| RP   | 17GFE259 | 555    | +    | -    | -   | +   | -    | -   |
| RP   | 17GFE262 | 555    | -    | -    | -   | -   | -    | -   |
|      |          | 372,44 | 30%  | 10%  | 10% | 20% | 0%   | 0%  |

\*Besides SCLC, NE neoplastic lesions include IPD: intrapulmonary dissemination, BL: bronchial lesions; AL: alveolar lesions. ADC: Adenocarcinoma. NL: nasal lesions.

**Table S11. Penetrance of lung lesions according to the targeted cell-of-origin and genotype. Related to Figure 1, 4, 5.**

| VIRUS       | GENOTYPE | MICE # | SCLC | *IPD | *BL | *AL | *ADC | *NL |
|-------------|----------|--------|------|------|-----|-----|------|-----|
| <b>CMV</b>  | RP       | 22     | 90%  | 90%  | 55% | 50% | 0%   | 15% |
|             | RP-Fgfr1 | 10     | 20%  | 0%   | 80% | 70% | 80%  | 64% |
| <b>CGRP</b> | RP       | 29     | 52%  | 34%  | 7%  | 28% | 3%   | 0%  |
|             | RP-Fgfr1 | 17     | 18%  | 18%  | 29% | 35% | 41%  | 70% |
| <b>K14</b>  | RP       | 15     | 60%  | 60%  | 7%  | 20% | 0%   | 29% |
|             | RP-Fgfr1 | 12     | 50%  | 50%  | 33% | 58% | 42%  | 67% |
| <b>SPC</b>  | RP       | 10     | 50%  | 50%  | 0%  | 10% | 0%   | 14% |
|             | RP-Fgfr1 | 17     | **0% | **0% | 6%  | 0%  | 100% | 8%  |
| <b>CC10</b> | RP       | 10     | 30%  | 10%  | 10% | 20% | 0%   | 0%  |
|             | RP-Fgfr1 | 9      | **0% | **0% | 0%  | 0%  | 89%  | 17% |

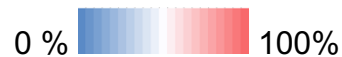

\*IPD: intrapulmonary dissemination; BL: bronchial lesions; AL: alveolar lesions; ADC: Adenocarcinoma.; NL: nasal lesions

\*\* RP-Fgfr1 mice were sacrificed earlier than RP mice, due to the presence of huge lesion of LADC; therefore we cannot exclude a late appearance of SCLC.

**Table S12. Latency range of lung tumors in RP mice injected in this study compared to previous publication by Sutherland et al., 2011. Related to Figure 5**

| <b>Virus</b> | <b>Latency Range</b> | <b>Study</b>            |
|--------------|----------------------|-------------------------|
| CGRP         | 268-413              | Ferone et al., 2020     |
| CGRP         | 255-464              | Sutherland et al., 2011 |
| SPC          | 301-505              | Ferone et al., 2020     |
| SPC          | 319-616              | Sutherland et al., 2011 |
| CC10         | 370-555              | Ferone et al., 2020     |
| CC10         | 389-640              | Sutherland et al., 2011 |

**Table S13. Comparison across a variety of studies of tumor type and location obtained in *Trp53<sup>F/F</sup>;Rb1<sup>F/F</sup>* mouse models by targeting distinct cell types. Related to Figure 7**

| Target cells            | Genetics                                                           | Inducer                 | Tumor type and location                                    | Reference               |
|-------------------------|--------------------------------------------------------------------|-------------------------|------------------------------------------------------------|-------------------------|
| NE                      | <i>Trp53<sup>F/F</sup>;Rb1<sup>F/F</sup></i>                       | *IT Ad5-CGRP-Cre        | SCLC in central lung                                       | Sutherland et al., 2011 |
| CLUB                    | <i>Trp53<sup>F/F</sup>;Rb1<sup>F/F</sup></i>                       | IT Ad5-CC10-Cre         | Rare ADC in alveolar space                                 | Sutherland et al., 2011 |
| AT2                     | <i>Trp53<sup>F/F</sup>;Rb1<sup>F/F</sup></i>                       | IT Ad5-SPC-Cre          | SCLC in central lung                                       | Sutherland et al., 2011 |
| All lung                | <i>Trp53<sup>F/F</sup>;Rb1<sup>F/F</sup></i>                       | IN Ad-Cre               | SCLC in main airways; *BADJs                               | Park et al., 2011       |
| CLUB                    | <i>Trp53<sup>F/F</sup>;Rb1<sup>F/F</sup>; Scgb1a1-Cre</i>          | constitutive            | No tumors                                                  | Park et al., 2011       |
| AT2                     | <i>Trp53<sup>F/F</sup>;Rb1<sup>F/F</sup></i>                       | *IN Ad-SPC-CreER + *Tam | Rare ADC in alveolar space                                 | Park et al., 2011       |
| AT2                     | <i>Trp53<sup>F/F</sup>;Rb1<sup>F/F</sup>;p130<sup>F/F</sup></i>    | IN Ad-SPC-CreER + Tam   | Rare ADC in alveolar space                                 | Park et al., 2011       |
| AT2 and bronchial cells | <i>Trp53<sup>F/F</sup>;Rb1<sup>F/F</sup>; SPC-rtTA/(tetO)7-Cre</i> | *Dox                    | Rare ADC in alveolar space (also without induction by Dox) | Park et al., 2011       |
| All lung cells          | <i>Trp53<sup>F/F</sup>;Rb1<sup>F/F</sup>;p130<sup>F/F</sup></i>    | IT Ad5-CMV-Cre          | SCLC in proximal and distal airways and BADJ               | Yang et al., 2018       |
| NE                      | <i>Trp53<sup>F/F</sup>;Rb1<sup>F/F</sup>;p130<sup>F/F</sup></i>    | IT Ad5-CGRP-Cre         | Fewer SCLC in proximal airways                             | Yang et al., 2018       |

\*IT = intratracheal delivery; IN = intranasal delivery; BADJs = bronchioalveolar duct junctions; Tam = Tamoxifen; Dox = Doxycycline
